# Supplementary material
Source: HighWire-hosted journal article supplement (https://bmjopen.bmj.com/content/14/11/e091152)
Supplement: inline-supplementary-material-1 [file inline-supplementary-material-1.pdf]

The study involving human participants is reviewed and approved by the Ethics Committee of Drugs (Devices) Clinical Trials at Henan Provincial People's Hospital (reference number: AF/SC-08/05.0), the Ethics Committee of Clinical Trials at the First Affiliated Hospital of Harbin Medical University, the Ethics Committee of Clinical Trials at Tongji Hospital in Shanghai, the Ethics Committee of Clinical Trials at Xinxiang Central Hospital, the Ethics Committee of Clinical Trials at Hebei Provincial People's Hospital, the Ethics Committee of Clinical Trials at Anhui Provincial Hospital, the Ethics Committee of Clinical Trials at Linyi People's Hospital, the Ethics Committee of Clinical Trials at Jiangsu Provincial People's Hospital, the Ethics Committee of Clinical Trials at the First Affiliated Hospital of Zhejiang University School of Medicine, the Ethics Committee of Clinical Trials at Zhejiang Provincial People's Hospital, the Ethics Committee of Clinical Trials at Taizhou First People's Hospital, the Ethics Committee of Clinical Trials at Beijing Luhe Hospital, affiliated with Capital Medical University, the Ethics Committee of Clinical Trials at Peking University Third Hospital, the Ethics Committee of Clinical Trials at Liaoning Provincial People's Hospital, the Ethics Committee of Clinical Trials at the General Hospital of the Northern Theater Command of the People's Liberation Army, and the Ethics Committee of Clinical Trials at Benxi Central Hospital.
